# Supplementary material for: The Effect of Strict Lockdown on Omicron SARS-CoV-2 Variant Transmission in Shanghai
Source: MDPI journal article supplement (doi:10.3390/vaccines10091392), 2022-08-25

**Supplementary information for**

**The effect of strict lockdown on Omicron SARS-CoV-2 variant transmission in  
Shanghai**

**Supplementary Table S1. Calculating sub-index scores for indicators of metrics.**

| <b>Name</b>                                  | <b>Coding</b>                                                                                                                                                       | <b>Score</b> |
|----------------------------------------------|---------------------------------------------------------------------------------------------------------------------------------------------------------------------|--------------|
| <b>C1(School closing)</b>                    | 0 - no measures                                                                                                                                                     | 0            |
|                                              | 1 - recommend closing or all schools open with alterations resulting in significant differences compared to non-Covid-19 operations                                 | 33.33        |
|                                              | 2 - require closing (only some levels or categories, eg just high school, or just public schools)                                                                   | 66.67        |
|                                              | 3 - require closing all levels                                                                                                                                      | 100          |
| <b>C2(Workplace closing)</b>                 | 0 - no measures                                                                                                                                                     | 0            |
|                                              | 1 - recommend closing (or recommend work from home) or all businesses open with alterations resulting in significant differences compared to non-Covid-19 operation | 33.33        |
|                                              | 2 - require closing (or work from home) for some sectors or categories of workers                                                                                   | 66.67        |
|                                              | 3 - require closing (or work from home) for all-but-essential workplaces (eg grocery stores, doctors)                                                               | 100          |
| <b>C3(Cancel public events)</b>              | 0 - no measures                                                                                                                                                     | 0            |
|                                              | 1 - recommend cancelling                                                                                                                                            | 50           |
|                                              | 2 - require cancelling                                                                                                                                              | 100          |
| <b>C4(Restrictions on gatherings)</b>        | 0 - no restrictions                                                                                                                                                 | 0            |
|                                              | 1 - restrictions on very large gatherings (the limit is above 1000 people)                                                                                          | 25           |
|                                              | 2 - restrictions on gatherings between 101-1000 people                                                                                                              | 50           |
|                                              | 3 - restrictions on gatherings between 11-100 people                                                                                                                | 75           |
|                                              | 4 - restrictions on gatherings of 10 people or less                                                                                                                 | 100          |
| <b>C5(Close public transport)</b>            | 0 - no measures                                                                                                                                                     | 0            |
|                                              | 1 - recommend closing (or significantly reduce volume/route/means of transport available)                                                                           | 50           |
|                                              | 2 - require closing (or prohibit most citizens from using it)                                                                                                       | 100          |
| <b>C6(Stay at home requirements)</b>         | 0 - no measures                                                                                                                                                     | 0            |
|                                              | 1 - recommend not leaving house                                                                                                                                     | 33.33        |
|                                              | 2 - require not leaving house with exceptions for daily exercise, grocery shopping, and 'essential' trips                                                           | 66.67        |
|                                              | 3 - require not leaving house with minimal exceptions (eg allowed to leave once a week, or only one person can leave at a time, etc)                                | 100          |
|                                              |                                                                                                                                                                     |              |
| <b>C7(Restrictions on internal movement)</b> | 0 - no measures                                                                                                                                                     | 0            |
|                                              | 1 - recommend not to travel between regions/cities                                                                                                                  | 50           |
|                                              | 2 - internal movement restrictions in place                                                                                                                         | 100          |
| <b>C8(International travel controls)</b>     | 0 - no restrictions                                                                                                                                                 | 0            |
|                                              | 1 - screening arrivals                                                                                                                                              | 25           |
|                                              | 2 - quarantine arrivals from some or all regions                                                                                                                    | 50           |
|                                              | 3 - ban arrivals from some regions                                                                                                                                  | 75           |

The scores of each indicator are calculated by the equation described in the website link ([https://github.com/OxCGRT/covid-policy-tracker/blob/master/documentation/index\\_methodology.md](https://github.com/OxCGRT/covid-policy-tracker/blob/master/documentation/index_methodology.md)).

**Supplementary Table S2. Stringency indices of lockdown policies implemented by different countries.**

| Country         | C1    | C2    | C3  | C4  | C5  | C6    | C7  | C8  | Stringency indices |
|-----------------|-------|-------|-----|-----|-----|-------|-----|-----|--------------------|
| India           | 100   | 100   | 100 | 100 | 100 | 100   | 100 | 100 | 100                |
| Italy           | 100   | 100   | 100 | 100 | 100 | 100   | 100 | 75  | 96.88              |
| Shanghai, China | 100   | 100   | 100 | 100 | 100 | 100   | 100 | 75  | 96.88              |
| Germany         | 100   | 100   | 100 | 100 | 50  | 100   | 100 | 75  | 90.62              |
| France          | 100   | 100   | 100 | 100 | 50  | 100   | 100 | 75  | 90.62              |
| United States   | 100   | 100   | 100 | 100 | 50  | 100   | 100 | 75  | 90.62              |
| Australia       | 100   | 66.67 | 100 | 100 | 50  | 100   | 100 | 100 | 89.58              |
| Canada          | 100   | 100   | 100 | 100 | 0   | 100   | 100 | 100 | 87.5               |
| Spain           | 100   | 100   | 100 | 100 | 50  | 100   | 50  | 100 | 87.5               |
| Netherland      | 100   | 100   | 100 | 100 | 50  | 100   | 50  | 75  | 84.37              |
| United Kingdom  | 100   | 100   | 100 | 100 | 50  | 100   | 100 | 0   | 81.25              |
| Singapore       | 100   | 100   | 100 | 100 | 0   | 66.67 | 100 | 75  | 80.21              |
| South Korea     | 100   | 100   | 100 | 100 | 0   | 66.67 | 100 | 75  | 80.21              |
| Norway          | 100   | 66.67 | 100 | 100 | 50  | 0     | 100 | 100 | 77.08              |
| Finland         | 66.67 | 66.67 | 100 | 100 | 0   | 33.33 | 100 | 100 | 70.83              |
| Denmark         | 100   | 66.67 | 50  | 100 | 50  | 33.33 | 50  | 100 | 68.75              |
| Sweden          | 66.67 | 66.67 | 100 | 100 | 50  | 33.33 | 50  | 75  | 67.71              |
| Japan           | 66.67 | 66.67 | 100 | 50  | 0   | 33.33 | 50  | 100 | 58.33              |

Stringency indices are simple averages of the individual component indicators.

**Supplementary Table S3. Daily new infections in Shanghai from March 1<sup>st</sup> to April 30<sup>th</sup>, 2022.**

| Date         | Daily symptomatic cases | Daily asymptomatic cases | Daily new infections |
|--------------|-------------------------|--------------------------|----------------------|
| Mar 01, 2022 | 1                       | 18                       | 19                   |
| Mar 02, 2022 | 3                       | 24                       | 27                   |
| Mar 03, 2022 | 2                       | 35                       | 37                   |
| Mar 04, 2022 | 3                       | 26                       | 29                   |
| Mar 05, 2022 | 0                       | 38                       | 38                   |
| Mar 06, 2022 | 3                       | 61                       | 64                   |
| Mar 07, 2022 | 4                       | 61                       | 65                   |
| Mar 08, 2022 | 3                       | 72                       | 75                   |
| Mar 09, 2022 | 4                       | 92                       | 96                   |
| Mar 10, 2022 | 11                      | 74                       | 85                   |
| Mar 11, 2022 | 5                       | 87                       | 92                   |
| Mar 12, 2022 | 1                       | 65                       | 66                   |
| Mar 13, 2022 | 41                      | 130                      | 171                  |
| Mar 14, 2022 | 9                       | 133                      | 142                  |
| Mar 15, 2022 | 5                       | 198                      | 203                  |
| Mar 16, 2022 | 8                       | 156                      | 164                  |
| Mar 17, 2022 | 57                      | 205                      | 262                  |
| Mar 18, 2022 | 8                       | 372                      | 380                  |
| Mar 19, 2022 | 17                      | 494                      | 511                  |
| Mar 20, 2022 | 24                      | 736                      | 760                  |
| Mar 21, 2022 | 31                      | 868                      | 899                  |
| Mar 22, 2022 | 4                       | 981                      | 985                  |
| Mar 23, 2022 | 4                       | 982                      | 986                  |
| Mar 24, 2022 | 29                      | 1587                     | 1616                 |
| Mar 25, 2022 | 38                      | 2233                     | 2271                 |
| Mar 26, 2022 | 45                      | 2633                     | 2678                 |
| Mar 27, 2022 | 50                      | 3454                     | 3504                 |
| Mar 28, 2022 | 96                      | 4382                     | 4478                 |
| Mar 29, 2022 | 326                     | 5658                     | 5984                 |
| Mar 30, 2022 | 355                     | 5299                     | 5654                 |
| Mar 31, 2022 | 358                     | 4145                     | 4503                 |
| Apr 01, 2022 | 260                     | 6051                     | 6311                 |
| Apr 02, 2022 | 438                     | 7789                     | 8227                 |
| Apr 03, 2022 | 425                     | 8585                     | 9010                 |
| Apr 04, 2022 | 268                     | 13088                    | 13356                |
| Apr 05, 2022 | 311                     | 16767                    | 17078                |
| Apr 06, 2022 | 322                     | 19661                    | 19983                |
| Apr 07, 2022 | 824                     | 20401                    | 21225                |
| Apr 08, 2022 | 1015                    | 22611                    | 23626                |
| Apr 09, 2022 | 1006                    | 23939                    | 24945                |
| Apr 10, 2022 | 914                     | 25173                    | 26087                |
| Apr 11, 2022 | 994                     | 22349                    | 23343                |

---

|                     |      |       |       |
|---------------------|------|-------|-------|
| <b>Apr 12, 2022</b> | 1189 | 25141 | 26330 |
| <b>Apr 13, 2022</b> | 2573 | 25147 | 27720 |
| <b>Apr 14, 2022</b> | 3200 | 19873 | 23073 |
| <b>Apr 15, 2022</b> | 3590 | 19925 | 23515 |
| <b>Apr 16, 2022</b> | 3238 | 21582 | 24820 |
| <b>Apr 17, 2022</b> | 2417 | 19831 | 22248 |
| <b>Apr 18, 2022</b> | 3084 | 17334 | 20418 |
| <b>Apr 19, 2022</b> | 2494 | 16408 | 18902 |
| <b>Apr 20, 2022</b> | 2634 | 15863 | 18497 |
| <b>Apr 21, 2022</b> | 1931 | 15698 | 17629 |
| <b>Apr 22, 2022</b> | 2736 | 20635 | 23371 |
| <b>Apr 23, 2022</b> | 1401 | 19657 | 21058 |
| <b>Apr 24, 2022</b> | 2472 | 16984 | 19456 |
| <b>Apr 25, 2022</b> | 1661 | 15319 | 16980 |
| <b>Apr 26, 2022</b> | 1606 | 11956 | 13562 |
| <b>Apr 27, 2022</b> | 1292 | 9330  | 10622 |
| <b>Apr 28, 2022</b> | 5487 | 9547  | 15034 |
| <b>Apr 29, 2022</b> | 1249 | 8932  | 10181 |
| <b>Apr 30, 2022</b> | 788  | 7086  | 7874  |

---

Daily new infections are the sum of symptomatic and asymptomatic cases.

**Supplementary Table S4. Daily stringency index in Shanghai.**

| Date         | C1    | C2    | C3  | C4    | C5  | C6    | C7  | C8 | Stringency index |
|--------------|-------|-------|-----|-------|-----|-------|-----|----|------------------|
| Mar 01, 2022 | 0     | 0     | 0   | 0     | 0   | 0     | 0   | 75 | 9.38             |
| Mar 02, 2022 | 0     | 0     | 0   | 0     | 0   | 0     | 0   | 75 | 9.38             |
| Mar 03, 2022 | 0     | 0     | 0   | 0     | 0   | 0     | 0   | 75 | 9.38             |
| Mar 04, 2022 | 0     | 0     | 0   | 0     | 0   | 0     | 0   | 75 | 9.38             |
| Mar 05, 2022 | 0     | 0     | 0   | 0     | 0   | 0     | 0   | 75 | 9.38             |
| Mar 06, 2022 | 0     | 0     | 0   | 0     | 0   | 0     | 0   | 75 | 9.38             |
| Mar 07, 2022 | 0     | 0     | 0   | 0     | 0   | 0     | 0   | 75 | 9.38             |
| Mar 08, 2022 | 0     | 0     | 0   | 0     | 0   | 0     | 0   | 75 | 9.38             |
| Mar 09, 2022 | 0     | 0     | 0   | 0     | 0   | 0     | 0   | 75 | 9.38             |
| Mar 10, 2022 | 0     | 0     | 0   | 0     | 0   | 0     | 0   | 75 | 9.38             |
| Mar 11, 2022 | 0     | 0     | 0   | 0     | 0   | 0     | 0   | 75 | 9.38             |
| Mar 12, 2023 | 0     | 0     | 0   | 0     | 0   | 0     | 0   | 75 | 9.38             |
| Mar 13, 2022 | 66.67 | 33.33 | 50  | 50    | 50  | 33.33 | 0   | 75 | 44.79            |
| Mar 14, 2022 | 66.67 | 33.33 | 50  | 50    | 50  | 33.33 | 0   | 75 | 44.79            |
| Mar 15, 2022 | 66.67 | 33.33 | 50  | 50    | 50  | 33.33 | 0   | 75 | 44.79            |
| Mar 16, 2022 | 66.67 | 33.33 | 50  | 50    | 50  | 33.33 | 0   | 75 | 44.79            |
| Mar 17, 2022 | 66.67 | 33.33 | 50  | 50    | 50  | 33.33 | 0   | 75 | 44.79            |
| Mar 18, 2022 | 66.67 | 33.33 | 50  | 50    | 50  | 33.33 | 0   | 75 | 44.79            |
| Mar 19, 2022 | 66.67 | 33.33 | 50  | 50    | 50  | 33.33 | 0   | 75 | 44.79            |
| Mar 20, 2022 | 66.67 | 33.33 | 50  | 50    | 50  | 33.33 | 0   | 75 | 44.79            |
| Mar 21, 2022 | 66.67 | 33.33 | 50  | 50    | 50  | 33.33 | 0   | 75 | 44.79            |
| Mar 22, 2022 | 66.67 | 33.33 | 50  | 50    | 50  | 33.33 | 0   | 75 | 44.79            |
| Mar 23, 2022 | 66.67 | 33.33 | 50  | 50    | 50  | 33.33 | 0   | 75 | 44.79            |
| Mar 24, 2022 | 66.67 | 33.33 | 50  | 50    | 50  | 33.33 | 0   | 75 | 44.79            |
| Mar 25, 2022 | 66.67 | 33.33 | 50  | 50    | 50  | 33.33 | 0   | 75 | 44.79            |
| Mar 26, 2022 | 66.67 | 33.33 | 50  | 50    | 50  | 33.33 | 0   | 75 | 44.79            |
| Mar 27, 2022 | 66.67 | 33.33 | 50  | 50    | 50  | 33.33 | 0   | 75 | 44.79            |
| Mar 28, 2022 | 83.33 | 50    | 75  | 62.50 | 75  | 83.33 | 25  | 75 | 66.15            |
| Mar 29, 2022 | 83.33 | 50    | 75  | 62.50 | 75  | 83.33 | 25  | 75 | 66.15            |
| Mar 30, 2022 | 83.33 | 50    | 75  | 62.50 | 75  | 83.33 | 25  | 75 | 66.15            |
| Mar 31, 2022 | 83.33 | 50    | 75  | 62.50 | 75  | 83.33 | 25  | 75 | 66.15            |
| Apr 01, 2022 | 100   | 100   | 100 | 100   | 100 | 100   | 100 | 75 | 96.88            |
| Apr 02, 2022 | 100   | 100   | 100 | 100   | 100 | 100   | 100 | 75 | 96.88            |
| Apr 03, 2022 | 100   | 100   | 100 | 100   | 100 | 100   | 100 | 75 | 96.88            |
| Apr 04, 2022 | 100   | 100   | 100 | 100   | 100 | 100   | 100 | 75 | 96.88            |
| Apr 05, 2022 | 100   | 100   | 100 | 100   | 100 | 100   | 100 | 75 | 96.88            |
| Apr 06, 2022 | 100   | 100   | 100 | 100   | 100 | 100   | 100 | 75 | 96.88            |
| Apr 07, 2022 | 100   | 100   | 100 | 100   | 100 | 100   | 100 | 75 | 96.88            |
| Apr 08, 2022 | 100   | 100   | 100 | 100   | 100 | 100   | 100 | 75 | 96.88            |
| Apr 09, 2022 | 100   | 100   | 100 | 100   | 100 | 100   | 100 | 75 | 96.88            |
| Apr 10, 2022 | 100   | 100   | 100 | 100   | 100 | 100   | 100 | 75 | 96.88            |
| Apr 11, 2022 | 100   | 100   | 100 | 100   | 100 | 100   | 100 | 75 | 96.88            |

|                     |     |     |     |     |     |     |     |    |       |
|---------------------|-----|-----|-----|-----|-----|-----|-----|----|-------|
| <b>Apr 12, 2022</b> | 100 | 100 | 100 | 100 | 100 | 100 | 100 | 75 | 96.88 |
| <b>Apr 13, 2022</b> | 100 | 100 | 100 | 100 | 100 | 100 | 100 | 75 | 96.88 |
| <b>Apr 14, 2022</b> | 100 | 100 | 100 | 100 | 100 | 100 | 100 | 75 | 96.88 |
| <b>Apr 15, 2022</b> | 100 | 100 | 100 | 100 | 100 | 100 | 100 | 75 | 96.88 |
| <b>Apr 16, 2022</b> | 100 | 100 | 100 | 100 | 100 | 100 | 100 | 75 | 96.88 |
| <b>Apr 17, 2022</b> | 100 | 100 | 100 | 100 | 100 | 100 | 100 | 75 | 96.88 |
| <b>Apr 18, 2022</b> | 100 | 100 | 100 | 100 | 100 | 100 | 100 | 75 | 96.88 |
| <b>Apr 19, 2022</b> | 100 | 100 | 100 | 100 | 100 | 100 | 100 | 75 | 96.88 |
| <b>Apr 20, 2022</b> | 100 | 100 | 100 | 100 | 100 | 100 | 100 | 75 | 96.88 |
| <b>Apr 21, 2022</b> | 100 | 100 | 100 | 100 | 100 | 100 | 100 | 75 | 96.88 |
| <b>Apr 22, 2022</b> | 100 | 100 | 100 | 100 | 100 | 100 | 100 | 75 | 96.88 |
| <b>Apr 23, 2022</b> | 100 | 100 | 100 | 100 | 100 | 100 | 100 | 75 | 96.88 |
| <b>Apr 24, 2022</b> | 100 | 100 | 100 | 100 | 100 | 100 | 100 | 75 | 96.88 |
| <b>Apr 25, 2022</b> | 100 | 100 | 100 | 100 | 100 | 100 | 100 | 75 | 96.88 |
| <b>Apr 26, 2022</b> | 100 | 100 | 100 | 100 | 100 | 100 | 100 | 75 | 96.88 |
| <b>Apr 27, 2022</b> | 100 | 100 | 100 | 100 | 100 | 100 | 100 | 75 | 96.88 |
| <b>Apr 28, 2022</b> | 100 | 100 | 100 | 100 | 100 | 100 | 100 | 75 | 96.88 |
| <b>Apr 29, 2022</b> | 100 | 100 | 100 | 100 | 100 | 100 | 100 | 75 | 96.88 |
| <b>Apr 30, 2022</b> | 100 | 100 | 100 | 100 | 100 | 100 | 100 | 75 | 96.88 |

**Supplementary Table S5. Daily new infections in the 16 districts of Shanghai.**

| Date   | Jingan | Huangpu | Pudong | Hongkou | Changning | Putuo | Xuhui | Yangpu |
|--------|--------|---------|--------|---------|-----------|-------|-------|--------|
| Mar 01 | 0      | 0       | 0      | 0       | 0         | 1     | 0     | 0      |
| Mar 02 | 0      | 0       | 0      | 0       | 0         | 6     | 0     | 0      |
| Mar 03 | 0      | 0       | 0      | 0       | 0         | 9     | 0     | 0      |
| Mar 04 | 0      | 1       | 0      | 0       | 0         | 1     | 0     | 0      |
| Mar 05 | 0      | 1       | 2      | 0       | 0         | 1     | 3     | 0      |
| Mar 06 | 1      | 1       | 2      | 0       | 0         | 5     | 5     | 0      |
| Mar 07 | 0      | 0       | 2      | 0       | 0         | 0     | 20    | 1      |
| Mar 08 | 2      | 0       | 3      | 0       | 1         | 2     | 9     | 0      |
| Mar 09 | 5      | 2       | 10     | 1       | 1         | 1     | 7     | 2      |
| Mar 10 | 2      | 1       | 10     | 6       | 1         | 4     | 8     | 0      |
| Mar 11 | 3      | 3       | 9      | 3       | 1         | 0     | 12    | 0      |
| Mar 12 | 1      | 3       | 35     | 0       | 2         | 1     | 1     | 0      |
| Mar 13 | 14     | 13      | 37     | 4       | 1         | 7     | 18    | 3      |
| Mar 14 | 0      | 2       | 1      | 1       | 0         | 0     | 3     | 0      |
| Mar 15 | 0      | 0       | 2      | 0       | 0         | 0     | 2     | 0      |
| Mar 16 | 3      | 9       | 43     | 10      | 4         | 4     | 7     | 2      |
| Mar 17 | 5      | 23      | 35     | 6       | 1         | 11    | 35    | 3      |
| Mar 18 | 13     | 15      | 65     | 19      | 7         | 22    | 41    | 8      |
| Mar 19 | 15     | 37      | 135    | 7       | 12        | 25    | 60    | 14     |
| Mar 20 | 0      | 2       | 1      | 0       | 1         | 0     | 1     | 0      |
| Mar 21 | 45     | 48      | 170    | 23      | 26        | 32    | 133   | 10     |
| Mar 22 | 28     | 59      | 237    | 13      | 20        | 21    | 86    | 3      |
| Mar 23 | 48     | 20      | 217    | 26      | 11        | 34    | 108   | 11     |
| Mar 24 | 71     | 102     | 195    | 29      | 59        | 38    | 167   | 21     |
| Mar 25 | 2      | 23      | 1915   | 4       | 4         | 9     | 3     | 11     |
| Mar 26 | 108    | 159     | 323    | 49      | 29        | 69    | 332   | 24     |
| Mar 27 | 70     | 56      | 1424   | 27      | 46        | 71    | 280   | 35     |
| Mar 28 | 103    | 283     | 2502   | 8       | 115       | 82    | 92    | 49     |
| Mar 29 | 180    | 112     | 2187   | 73      | 36        | 112   | 1088  | 98     |
| Mar 30 | 100    | 363     | 2198   | 84      | 130       | 148   | 400   | 99     |
| Mar 31 | 162    | 124     | 2404   | 126     | 258       | 17    | 226   | 174    |
| Apr 01 | 189    | 247     | 2597   | 60      | 38        | 249   | 631   | 135    |
| Apr 02 | 326    | 658     | 2056   | 344     | 100       | 389   | 1035  | 275    |
| Apr 03 | 344    | 827     | 3669   | 189     | 104       | 325   | 498   | 374    |
| Apr 04 | 60     | 981     | 6993   | 609     | 39        | 259   | 1231  | 225    |
| Apr 05 | 317    | 663     | 8054   | 411     | 92        | 489   | 925   | 626    |
| Apr 06 | 543    | 1050    | 8447   | 670     | 359       | 1035  | 1106  | 633    |
| Apr 07 | 382    | 1382    | 9041   | 594     | 854       | 958   | 2073  | 601    |
| Apr 08 | 665    | 2607    | 7286   | 378     | 614       | 1094  | 1629  | 701    |
| Apr 09 | 602    | 548     | 11130  | 349     | 757       | 653   | 1150  | 1080   |
| Apr 10 | 603    | 1761    | 6732   | 1238    | 405       | 1001  | 3185  | 1877   |
| Apr 11 | 552    | 2223    | 8306   | 1375    | 393       | 1878  | 1771  | 1420   |

|               |      |      |       |      |      |      |      |      |
|---------------|------|------|-------|------|------|------|------|------|
| <b>Apr 12</b> | 1056 | 1804 | 11049 | 931  | 1133 | 1170 | 1108 | 1159 |
| <b>Apr 13</b> | 220  | 1408 | 15027 | 1488 | 957  | 475  | 1492 | 1185 |
| <b>Apr 14</b> | 266  | 2013 | 11656 | 930  | 998  | 264  | 1342 | 817  |
| <b>Apr 15</b> | 433  | 1384 | 10282 | 1497 | 752  | 426  | 1689 | 1411 |
| <b>Apr 16</b> | 1134 | 1565 | 10791 | 1027 | 706  | 1331 | 1532 | 860  |
| <b>Apr 17</b> | 842  | 1896 | 7740  | 1166 | 739  | 1225 | 1553 | 887  |
| <b>Apr 18</b> | 1010 | 3323 | 8831  | 1092 | 680  | 371  | 572  | 481  |
| <b>Apr 19</b> | 1733 | 3084 | 5646  | 753  | 618  | 528  | 1608 | 766  |
| <b>Apr 20</b> | 1130 | 3097 | 4465  | 832  | 726  | 555  | 1447 | 2005 |
| <b>Apr 21</b> | 2064 | 1752 | 4655  | 885  | 496  | 489  | 1366 | 543  |
| <b>Apr 22</b> | 786  | 2843 | 7961  | 997  | 713  | 523  | 1275 | 1356 |
| <b>Apr 23</b> | 471  | 1959 | 7626  | 819  | 727  | 478  | 1722 | 1277 |
| <b>Apr 24</b> | 1702 | 1755 | 6181  | 655  | 749  | 477  | 1396 | 1235 |
| <b>Apr 25</b> | 1016 | 2671 | 3912  | 1270 | 534  | 418  | 1341 | 1244 |
| <b>Apr 26</b> | 1394 | 1228 | 2745  | 1136 | 419  | 365  | 904  | 1106 |
| <b>Apr 27</b> | 1089 | 1452 | 2993  | 1091 | 208  | 301  | 552  | 526  |
| <b>Apr 28</b> | 1364 | 2656 | 3472  | 1374 | 647  | 235  | 1580 | 808  |
| <b>Apr 29</b> | 1267 | 1399 | 2028  | 925  | 377  | 141  | 602  | 767  |
| <b>Apr 30</b> | 996  | 1156 | 1625  | 591  | 181  | 114  | 488  | 342  |

| <b>Date</b>   | <b>Chongming</b> | <b>Minhang</b> | <b>Jinshan</b> | <b>Baoshan</b> | <b>Songjiang</b> | <b>Qingpu</b> | <b>Jiading</b> | <b>Fengxian</b> |
|---------------|------------------|----------------|----------------|----------------|------------------|---------------|----------------|-----------------|
| <b>Mar 01</b> | 0                | 0              | 0              | 0              | 0                | 0             | 1              | 0               |
| <b>Mar 02</b> | 0                | 0              | 0              | 1              | 0                | 0             | 1              | 0               |
| <b>Mar 03</b> | 0                | 0              | 0              | 2              | 5                | 0             | 0              | 0               |
| <b>Mar 04</b> | 0                | 1              | 0              | 1              | 6                | 2             | 7              | 0               |
| <b>Mar 05</b> | 0                | 6              | 0              | 2              | 7                | 1             | 4              | 1               |
| <b>Mar 06</b> | 0                | 7              | 0              | 6              | 7                | 0             | 12             | 2               |
| <b>Mar 07</b> | 0                | 10             | 1              | 5              | 3                | 0             | 13             | 0               |
| <b>Mar 08</b> | 0                | 12             | 0              | 11             | 14               | 3             | 8              | 0               |
| <b>Mar 09</b> | 0                | 23             | 0              | 2              | 9                | 0             | 16             | 1               |
| <b>Mar 10</b> | 0                | 15             | 0              | 11             | 9                | 4             | 4              | 0               |
| <b>Mar 11</b> | 0                | 20             | 4              | 8              | 5                | 2             | 12             | 1               |
| <b>Mar 12</b> | 0                | 11             | 4              | 3              | 1                | 0             | 3              | 0               |
| <b>Mar 13</b> | 0                | 28             | 7              | 4              | 7                | 4             | 20             | 2               |
| <b>Mar 14</b> | 0                | 1              | 0              | 0              | 1                | 0             | 0              | 0               |
| <b>Mar 15</b> | 0                | 1              | 0              | 0              | 0                | 0             | 0              | 0               |
| <b>Mar 16</b> | 0                | 18             | 0              | 11             | 4                | 1             | 40             | 2               |
| <b>Mar 17</b> | 3                | 79             | 1              | 10             | 10               | 1             | 34             | 3               |
| <b>Mar 18</b> | 0                | 60             | 17             | 27             | 13               | 16            | 44             | 7               |
| <b>Mar 19</b> | 23               | 53             | 3              | 17             | 16               | 5             | 81             | 6               |
| <b>Mar 20</b> | 0                | 18             | 0              | 0              | 0                | 0             | 1              | 0               |
| <b>Mar 21</b> | 40               | 120            | 16             | 66             | 38               | 5             | 102            | 22              |
| <b>Mar 22</b> | 19               | 306            | 3              | 16             | 31               | 20            | 111            | 8               |
| <b>Mar 23</b> | 54               | 254            | 5              | 69             | 34               | 10            | 69             | 13              |

|               |     |      |     |      |      |     |      |     |
|---------------|-----|------|-----|------|------|-----|------|-----|
| <b>Mar 24</b> | 82  | 489  | 12  | 87   | 92   | 13  | 130  | 24  |
| <b>Mar 25</b> | 41  | 206  | 1   | 4    | 15   | 13  | 18   | 0   |
| <b>Mar 26</b> | 27  | 970  | 4   | 153  | 82   | 20  | 242  | 85  |
| <b>Mar 27</b> | 237 | 616  | 14  | 94   | 190  | 43  | 252  | 45  |
| <b>Mar 28</b> | 68  | 369  | 19  | 312  | 95   | 56  | 209  | 115 |
| <b>Mar 29</b> | 56  | 986  | 26  | 362  | 234  | 84  | 253  | 95  |
| <b>Mar 30</b> | 195 | 780  | 33  | 507  | 248  | 78  | 160  | 130 |
| <b>Mar 31</b> | 43  | 389  | 43  | 17   | 190  | 98  | 54   | 177 |
| <b>Apr 01</b> | 84  | 1029 | 50  | 46   | 507  | 87  | 200  | 162 |
| <b>Apr 02</b> | 111 | 822  | 61  | 480  | 573  | 224 | 614  | 158 |
| <b>Apr 03</b> | 144 | 937  | 103 | 463  | 264  | 220 | 424  | 121 |
| <b>Apr 04</b> | 49  | 1381 | 53  | 268  | 569  | 320 | 247  | 70  |
| <b>Apr 05</b> | 78  | 2940 | 82  | 555  | 801  | 400 | 491  | 153 |
| <b>Apr 06</b> | 63  | 2408 | 79  | 662  | 783  | 469 | 1408 | 267 |
| <b>Apr 07</b> | 262 | 2255 | 128 | 416  | 754  | 495 | 934  | 93  |
| <b>Apr 08</b> | 170 | 2854 | 90  | 2821 | 771  | 342 | 1505 | 97  |
| <b>Apr 09</b> | 171 | 4624 | 68  | 2261 | 500  | 557 | 369  | 124 |
| <b>Apr 10</b> | 55  | 3189 | 57  | 1839 | 1825 | 877 | 1405 | 38  |
| <b>Apr 11</b> | 57  | 3007 | 38  | 1024 | 691  | 331 | 208  | 68  |
| <b>Apr 12</b> | 86  | 4245 | 39  | 295  | 712  | 524 | 986  | 33  |
| <b>Apr 13</b> | 63  | 2939 | 34  | 651  | 657  | 319 | 721  | 83  |
| <b>Apr 14</b> | 60  | 2378 | 28  | 417  | 761  | 304 | 803  | 35  |
| <b>Apr 15</b> | 92  | 2037 | 31  | 1323 | 773  | 536 | 741  | 106 |
| <b>Apr 16</b> | 49  | 3060 | 21  | 1293 | 410  | 305 | 685  | 51  |
| <b>Apr 17</b> | 52  | 2402 | 24  | 1450 | 905  | 369 | 978  | 20  |
| <b>Apr 18</b> | 26  | 1372 | 7   | 1030 | 762  | 257 | 588  | 14  |
| <b>Apr 19</b> | 80  | 1602 | 9   | 957  | 325  | 389 | 743  | 60  |
| <b>Apr 20</b> | 65  | 1686 | 25  | 833  | 676  | 280 | 641  | 32  |
| <b>Apr 21</b> | 120 | 2563 | 30  | 978  | 493  | 385 | 776  | 34  |
| <b>Apr 22</b> | 117 | 1305 | 26  | 2033 | 2568 | 359 | 500  | 8   |
| <b>Apr 23</b> | 208 | 877  | 44  | 2886 | 773  | 424 | 751  | 16  |
| <b>Apr 24</b> | 95  | 1229 | 68  | 2506 | 548  | 251 | 601  | 7   |
| <b>Apr 25</b> | 474 | 717  | 22  | 1786 | 641  | 379 | 543  | 12  |
| <b>Apr 26</b> | 467 | 749  | 28  | 1976 | 287  | 311 | 434  | 13  |
| <b>Apr 27</b> | 199 | 321  | 41  | 1115 | 231  | 208 | 292  | 3   |
| <b>Apr 28</b> | 38  | 422  | 28  | 1243 | 402  | 269 | 488  | 6   |
| <b>Apr 29</b> | 269 | 516  | 19  | 1197 | 134  | 156 | 268  | 26  |
| <b>Apr 30</b> | 308 | 431  | 11  | 1133 | 105  | 128 | 259  | 4   |

**Supplementary Table S6. The Omicron cases peaking date、EI and population of each district in Shanghai.**

| District  | the date of peaking | Effective Interval (EI) | Population (*10000) |
|-----------|---------------------|-------------------------|---------------------|
| Jingan    | Apr 21, 2022        | 20                      | 97.57               |
| Huangpu   | Apr 20, 2022        | 19                      | 66.2                |
| Pudong    | Apr 13, 2022        | 16                      | 568.15              |
| Hongkou   | Apr 14, 2022        | 13                      | 75.75               |
| Changning | Apr 12, 2022        | 11                      | 69.31               |
| Putuo     | Apr 11, 2022        | 10                      | 123.98              |
| Xuhui     | Apr 11, 2022        | 10                      | 111.31              |
| Yangpu    | Apr 11, 2022        | 10                      | 124.25              |
| Chongming | Apr 07, 2022        | 10                      | 63.79               |
| Minhang   | Apr 11, 2022        | 10                      | 265.35              |
| Jinshan   | Apr 06, 2022        | 9                       | 82.28               |
| Baoshan   | Apr 09, 2022        | 8                       | 223.52              |
| Songjiang | Apr 09, 2022        | 8                       | 190.97              |
| Qingpu    | Apr 09, 2022        | 8                       | 127.14              |
| Jiading   | Apr 08, 2022        | 7                       | 183.43              |
| Fengxian  | Apr 03, 2022        | 6                       | 114.09              |

Population information is from the seventh national population census

**Supplementary Table S7. Daily subway ridership of each district in Shanghai.**

| District         | Daily subway ridership |              |              |              |              |
|------------------|------------------------|--------------|--------------|--------------|--------------|
|                  | Apr 18, 2015           | Apr 19, 2015 | Apr 22, 2015 | Apr 23, 2015 | Apr 24, 2015 |
|                  | Saturday               | Sunday       | Wednesday    | Thursday     | Friday       |
| <b>Pudong</b>    | 1377457                | 1152531      | 1973473      | 1962125      | 2071716      |
| <b>Xuhui</b>     | 886461                 | 734761       | 1211410      | 1191835      | 1264453      |
| <b>Jingan</b>    | 681097                 | 597587       | 941280       | 942166       | 996443       |
| <b>Huangpu</b>   | 782415                 | 627119       | 893713       | 886328       | 953056       |
| <b>Minhang</b>   | 663753                 | 597381       | 831994       | 823760       | 893802       |
| <b>Changning</b> | 500679                 | 412097       | 739678       | 732458       | 768845       |
| <b>Putuo</b>     | 436150                 | 366340       | 595978       | 593085       | 613605       |
| <b>Baoshan</b>   | 399426                 | 338882       | 520456       | 517868       | 541181       |
| <b>Hongkou</b>   | 361236                 | 300660       | 492646       | 493499       | 513425       |
| <b>Yangpu</b>    | 323327                 | 266286       | 388740       | 386820       | 415962       |
| <b>Songjiang</b> | 217269                 | 186576       | 250004       | 246818       | 269363       |
| <b> Jiading</b>  | 203319                 | 177323       | 232934       | 232032       | 247363       |
| <b>Qingpu</b>    | 56896                  | 57773        | 106088       | 102790       | 110319       |
| <b>Fengxian</b>  | 0                      | 0            | 0            | 0            | 0            |
| <b>Jinshan</b>   | 0                      | 0            | 0            | 0            | 0            |
| <b>Chongming</b> | 0                      | 0            | 0            | 0            | 0            |

Subway ridership dataset of Shanghai was shared by Chinese Software Developer Network.

**Supplementary Figure S1. The change of time-dependent effective reproductive number in Shanghai’s Omicron wave.**

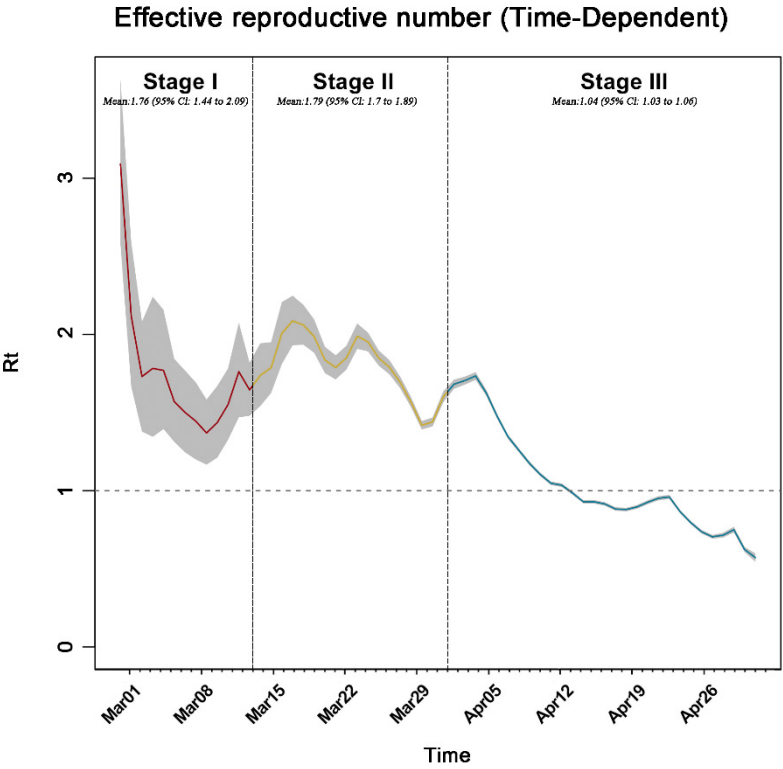

**Supplementary Figure S2. Distribution of subway stations whose daily ridership on five days in April, 2015 were used for population mobility calculation in each district.**

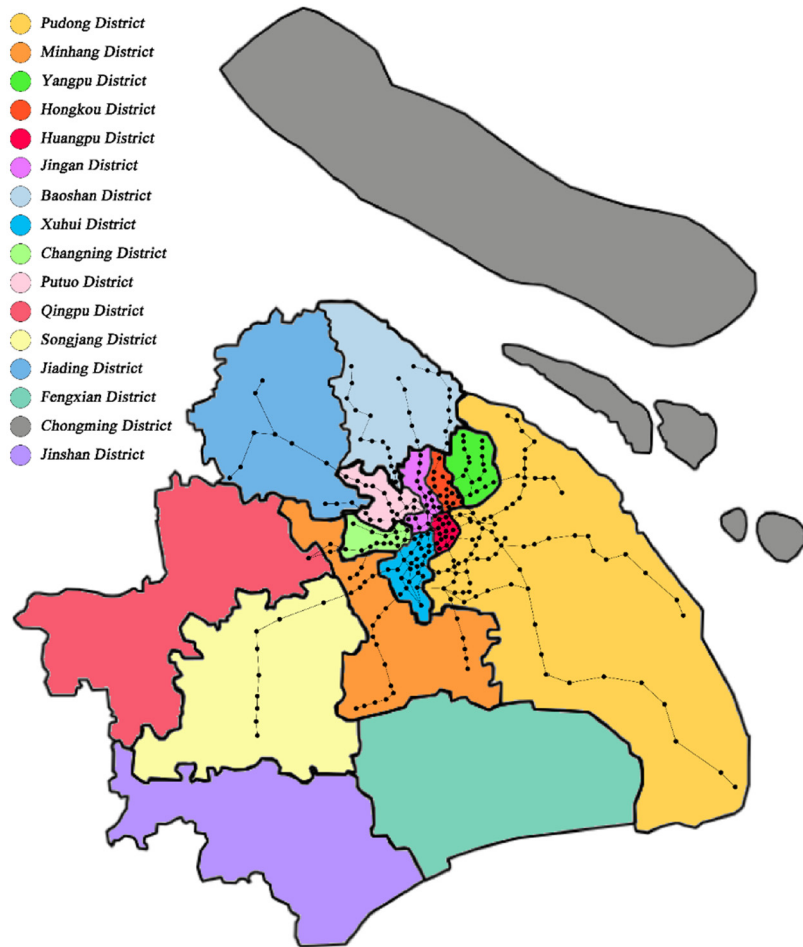

Supplement: s1 [file s1]
